# Supplementary material for: Polyhydroxyalkanoate (PHA) Production in Pseudomonas sp. phDV1 Strain Grown on Phenol as Carbon Sources
Source: MDPI journal article supplement (doi:10.3390/microorganisms9081636), 2021-07-30
Supplement: s1 [file s1]

## Supplementary Materials

### Polyhydroxyalkanoate (PHA) production in *Pseudomonas* sp. strain phDV1 grown on phenol as carbon source

Iliana Kanavaki<sup>1</sup>, Athina Drakonaki<sup>1</sup>, Ermis D. Geladas<sup>1</sup>, Apostolos Spyros<sup>1</sup>, Hao Xie<sup>2</sup> and Georgios Tsiotis<sup>1</sup>

1) Department of Chemistry, University of Crete, P.O. Box 2208, GR-71003 Voutes, Greece

2) Max Planck Institute of Biophysics, Max-von-Laue-Strasse 3, D-60438 Frankfurt am Main, Germany

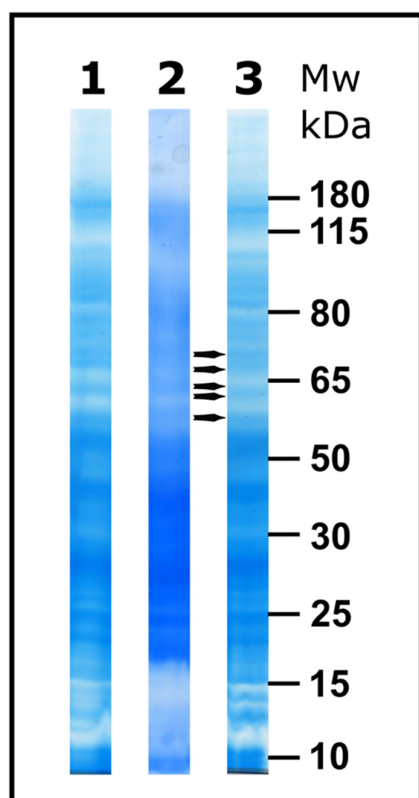

**Figure S1.** SDS-PAGE analysis of crude protein extracts isolated from *Pseudomonas* sp. strain phDV1 grown in 200 mg/L phenol (Lane 1), 400 mg/L phenol (Lane 2) and 600 mg/L phenol (Lane 3). Arrows indicate the protein bands in which the class I poly(R)-hydroxyalkanoic acid synthase (A0A385B2S5) was identified by mass spectroscopy.

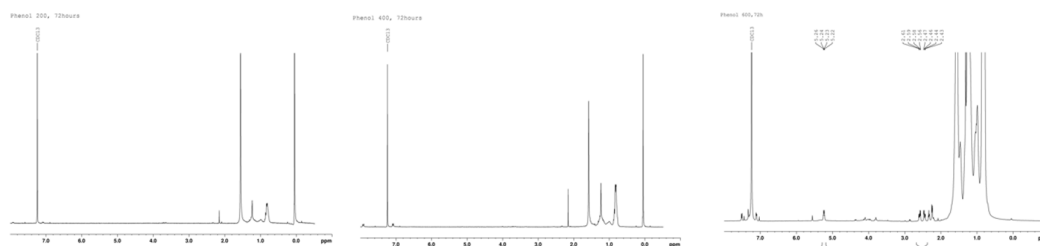

**Figure S2.** <sup>1</sup>H NMR Spectra of the isolated PHB from cell grown in 200 mg/L, 400 mg/L and 600 mg/L phenol.
